# Supplementary material
Source: publisher site journal article supplement (https://static.cambridge.org/content/id/urn:cambridge.org:id:article:S2516712X20000271/resource/name/S2516712X20000271supp001.docx)
Supplement: Supplementary file 1 [file S2516712X20000271supp001.docx]

Experimental Results

**Supplementary material for:**

Guimarães, M. J. M., Araújo, L. R. S., Mogami, C. A., Rezende, F. A. and Santos, I. E. A. (2020) Use of navigation GPSs in small topographical surveying. *Experimental Results.*


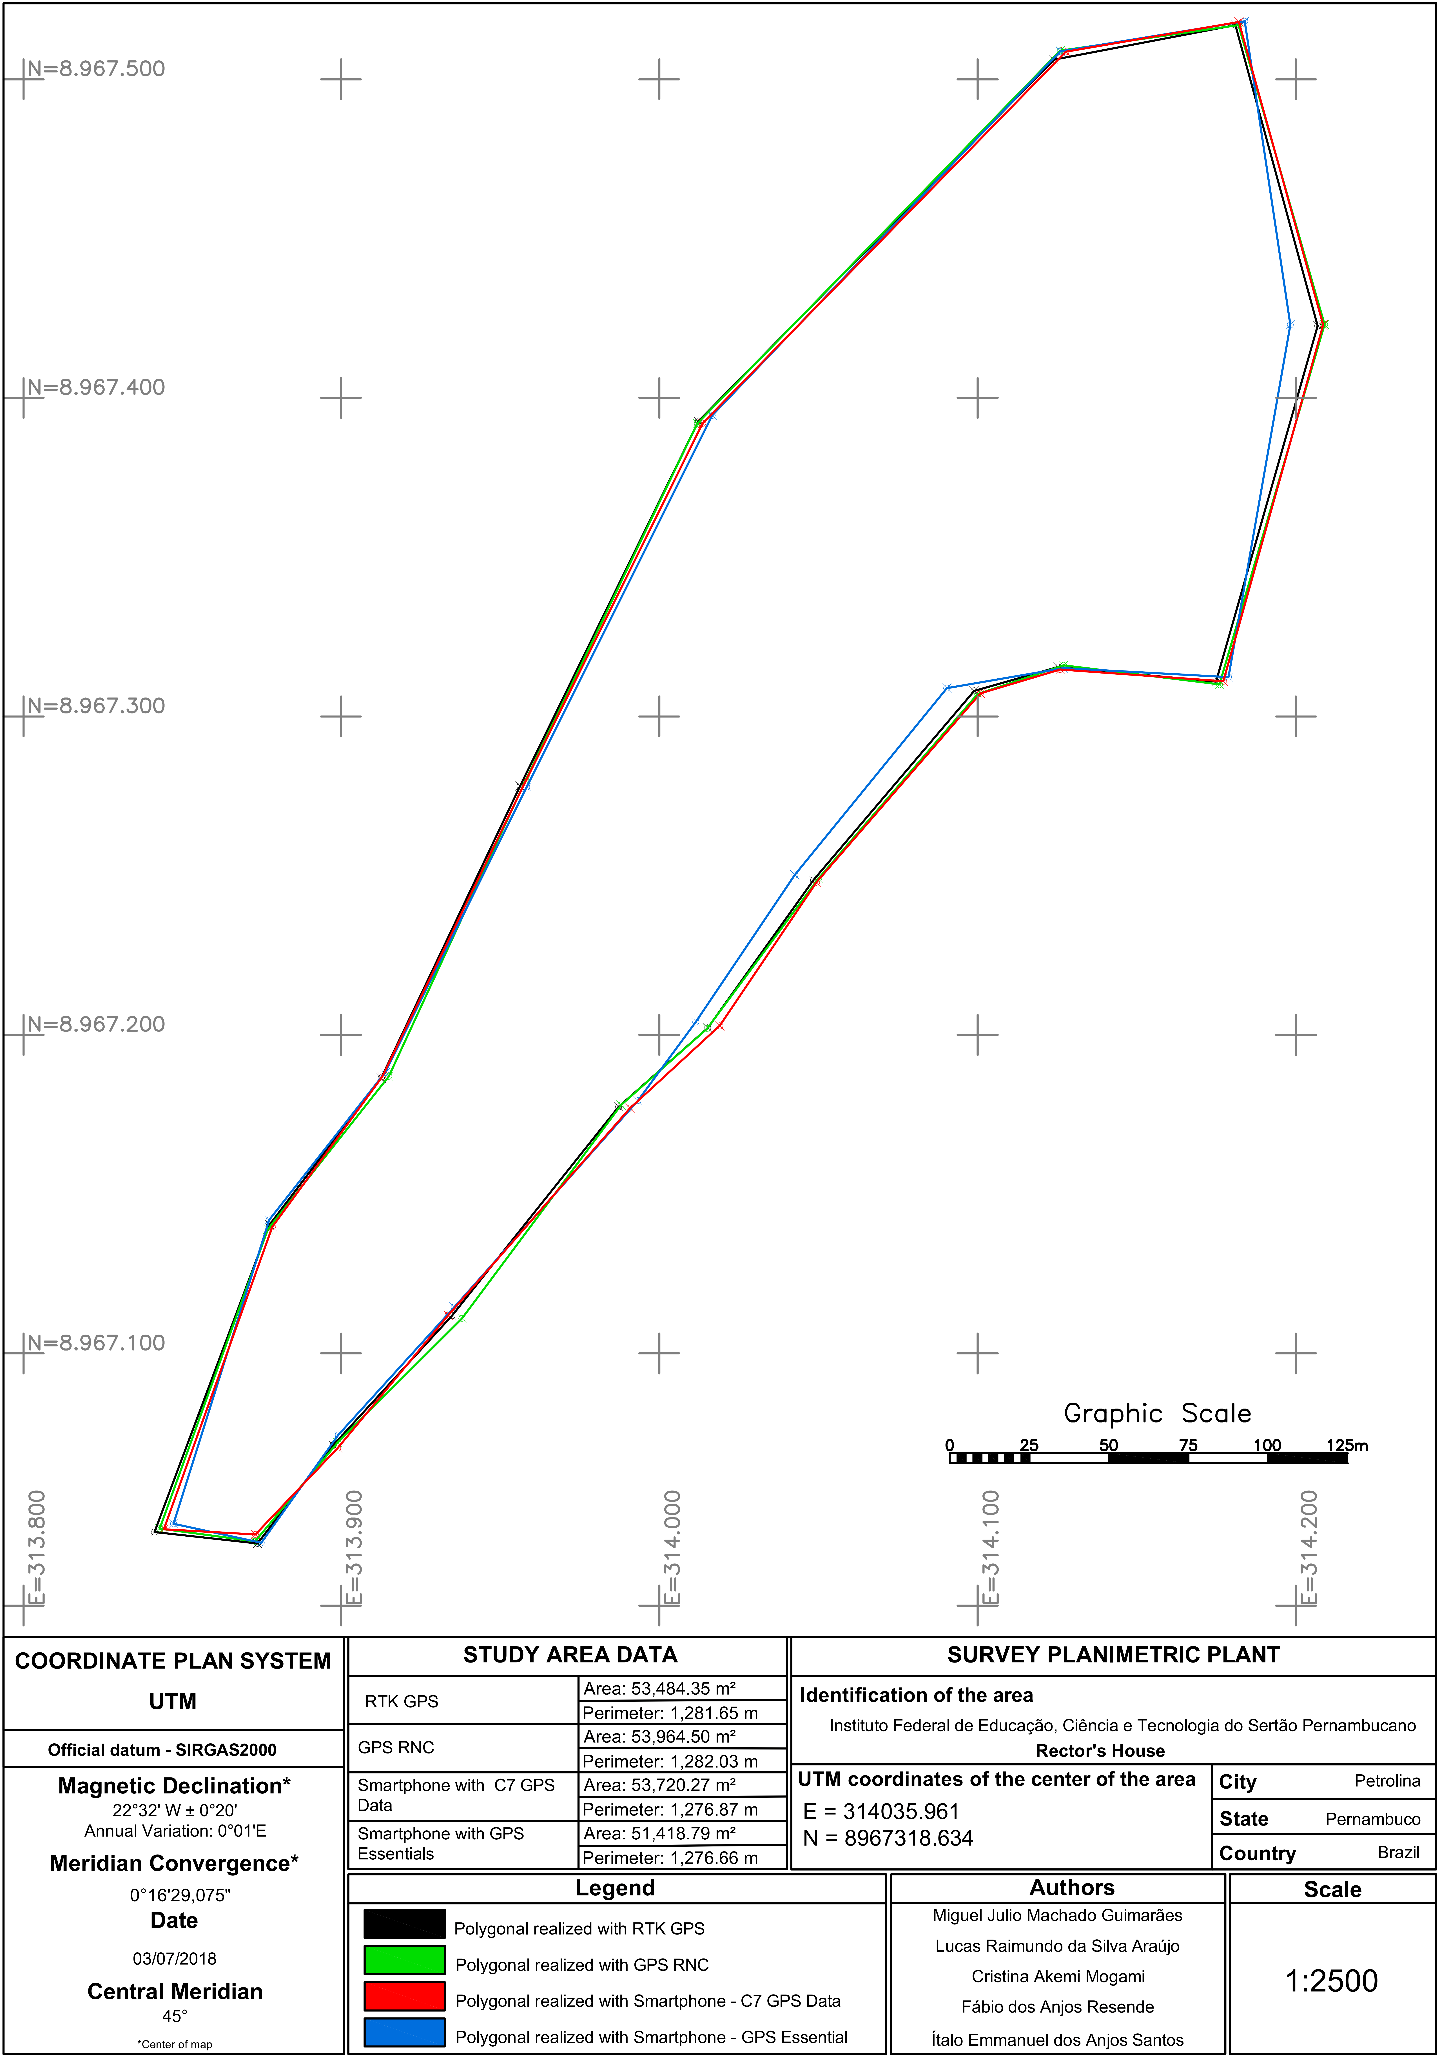


Supplementary Figure S1. Planimetric survey of the study area.
